# Supplementary material for: Butterfly wing patterns create powerful illusory motion cues
Source: Research Square preprint supplement (doi:10.21203/rs.3.rs-7819374/v1), 2025-10-13
Supplement: Supplementary file 1 [file 3ebd288721b1ae18b466c57b.pdf]

## Butterfly wing patterns create powerful illusory motion cues

### Real butterfly take-off recordings

#### Motion energy across frames

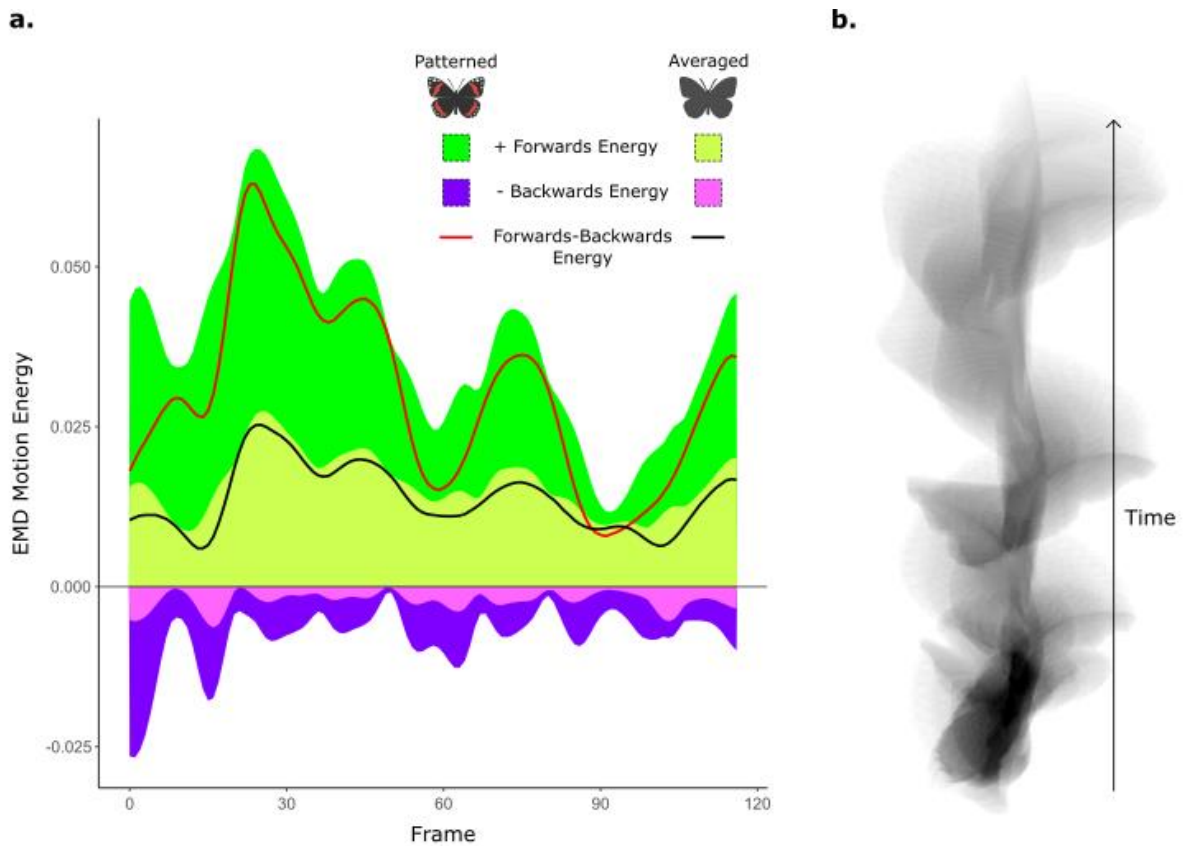

**Supplementary Fig.1 | Motion energy and confusion across frames, a.** example motion forwards and backwards motion energy level for a red admiral, *Vanessa atalanta*, in free flight with its natural patterning and with its patterned averaged. Backwards energy is depicted as negative as it is an opponent to forwards energy. Lines represent the forwards energy subtracted by the backwards energy. The initial peak in forwards and backwards energy represents the point of takeoff for the butterfly and is also when backwards energy is at its highest. Patterning increases the overall energy compared to the unpatterned and increases the ratio of backwards energy in proportion to forwards energy at multiple instances during flight. **b.** Shows the position of the butterfly across time, starting from the bottom, by masking the butterfly for each frame, adding each frame together, and then dividing by the number of frames. Note, as the butterfly does not fly in a straight line forwards and backwards, energy will not always correspond with the heading of the butterfly.

22     **Ratios of energy across directions**

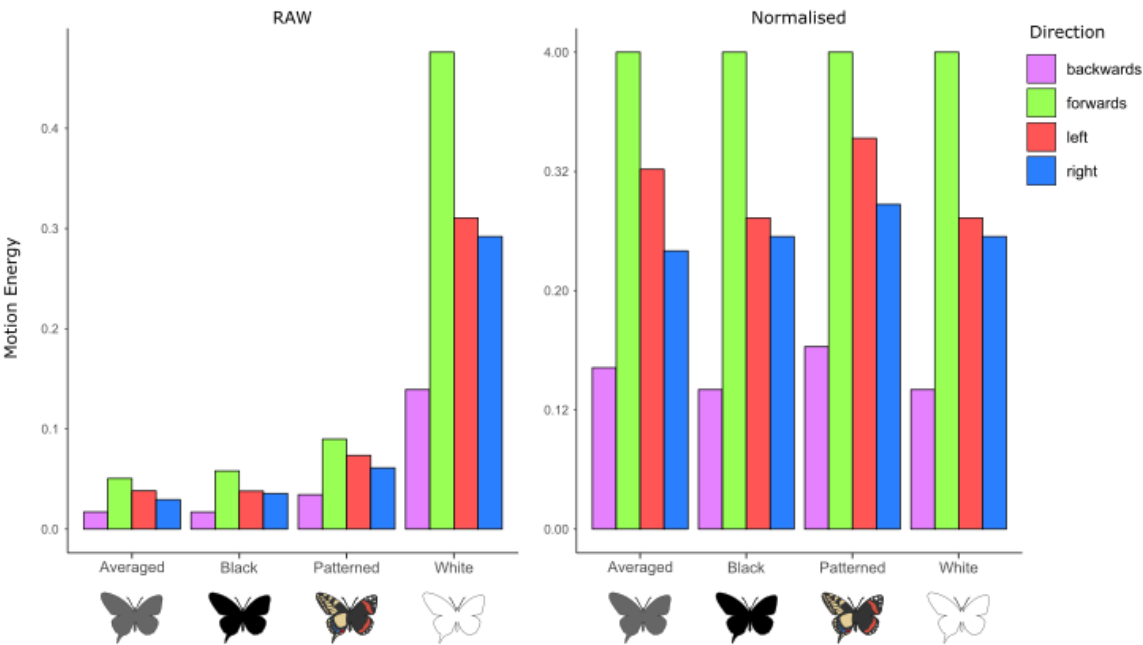

**Supplementary Fig.2 | Motion energy ratios**, depicts the average motion energy across all frames for all butterfly flights, with the different colour treatments. Energy is split into the four cardinal directions (backwards, forwards, left, and right). The left panel shows the raw average, while the right panel shows the energy divided by the greatest energy value across the four directions. Energy in general is higher for the white treatment compared to other treatments as the white is more contrasting against the background, followed by the patterned. Butterfly wing patterning overall increases the proportion of backwards, left, and right energy compared to forwards.

**Influence of patterning on motion confusion metrics**

Forwards-Confusion

**Supplementary Table 1 | Tukey posthoc test for real butterfly takeoff forwards-confusion**

| Contrast              | Estimate | SE    | DF   | T ratio | P value |
|-----------------------|----------|-------|------|---------|---------|
| Patterned vs Averaged | 0.079    | 0.007 | 9350 | 11.504  | <0.001  |
| Patterned vs Black    | 0.078    | 0.007 | 9350 | 11.478  | <0.001  |
| Patterned vs White    | 0.078    | 0.007 | 9350 | 11.472  | <0.001  |
| Averaged vs Black     | 0        | 0.007 | 9350 | -0.026  | 1       |
| Averaged vs White     | 0        | 0.007 | 9350 | -0.032  | 1       |
| Black vs White        | 0        | 0.007 | 9350 | -0.006  | 1       |

### Sideways-Confusion

**Supplementary Table 2 | Tukey posthoc test for real butterfly takeoff sideways-confusion**

| Contrast              | Estimate | SE    | DF   | T ratio | P value |
|-----------------------|----------|-------|------|---------|---------|
| Patterned vs Averaged | 0.044    | 0.005 | 9352 | 9.538   | <0.001  |
| Patterned vs Black    | 0.044    | 0.005 | 9352 | 9.538   | <0.001  |
| Patterned vs White    | 0.044    | 0.005 | 9352 | 9.538   | <0.001  |
| Averaged vs Black     | 0        | 0.005 | 9352 | 0.105   | 1       |
| Averaged vs White     | 0        | 0.005 | 9352 | 0.104   | 1       |
| Black vs White        | 0        | 0.005 | 9352 | -0.001  | 1       |

### Forwards-Energy

All butterfly pattern treatments were significantly different from one another for forwards-energy. On average butterflies with a higher contrast against the background (white) have increased forwards-energy. Patterning increases forwards-energy compared to averaged and produces marginally greater forwards energy than black, likely due to the white colours present on the different butterfly species. The averaged butterflies were significantly worse than all other pattern treatments.

**Supplementary Table 3 | Tukey posthoc test for real butterfly takeoff forwards-energy**

| Contrast              | Estimate | SE    | DF   | T ratio  | P value |
|-----------------------|----------|-------|------|----------|---------|
| Patterned vs Averaged | 0.081    | 0.004 | 9362 | 22.286   | <0.001  |
| Patterned vs Black    | 0.010    | 0.004 | 9362 | 2.629    | 0.0426  |
| Patterned vs White    | -0.415   | 0.004 | 9362 | -114.567 | <0.001  |
| Averaged vs Black     | -0.071   | 0.004 | 9362 | -19.658  | <0.001  |
| Averaged vs White     | -0.496   | 0.004 | 9362 | -136.854 | <0.001  |
| Black vs White        | -0.424   | 0.004 | 9362 | -117.196 | <0.001  |

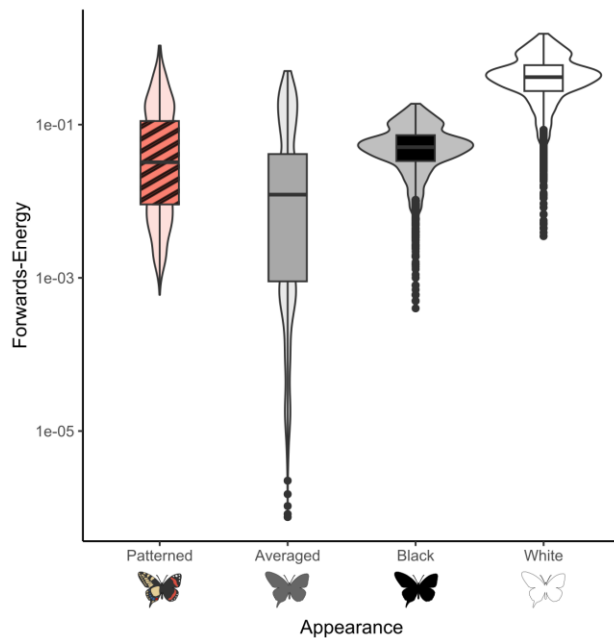

**Supplementary Fig.3 | Influence of patterning on forwards-energy**, boxplots with violins for forward energy across all frames for all 7 butterfly wing morphotypes with patterning, and without patterning (averaged, black, and white).

## Motion confusion across European butterflies

### Butterfly phylogeny principal coordinates

For our principal coordinates:

High PCo1 values corresponded with Nymphalids, predominantly Satyrinae, while low values corresponded with Lycaenidae.

High PCo2 values corresponded with Hesperidae and to a lesser extent Pieridae and Papilionidae, while low values corresponded with Lycaenidae and Nymphalidae.

High PCo3 values corresponded with Hesperidae while low values corresponded with Pieridae. Intermediate values comprised all other families.

See Supplementary Fig. 4 and Fig. 5.

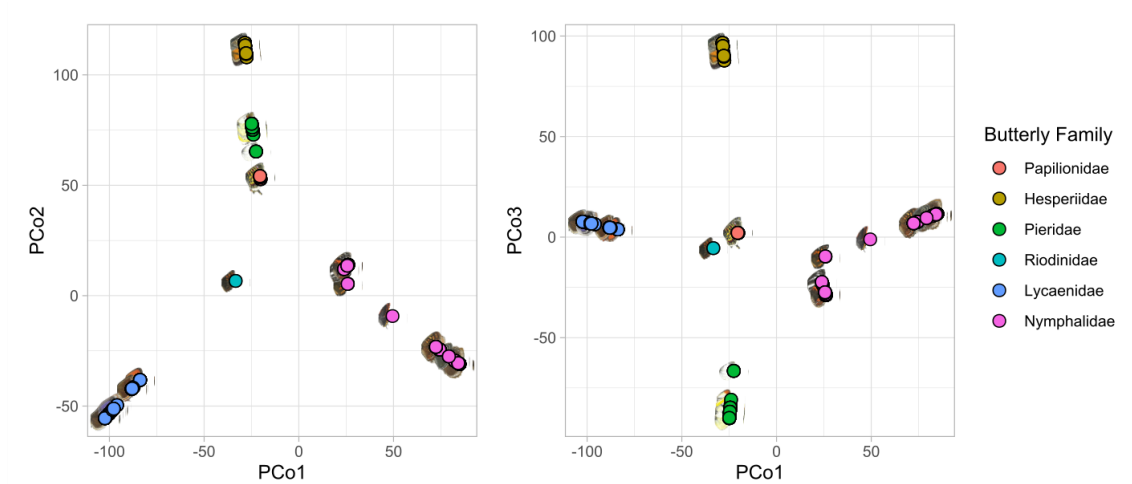

**Supplementary Fig.4 | Principal coordinates for European butterflies**, plots show the principal coordinates (PCos) for the 6 European butterfly families. The left hand plot shows the positions of PCo1 and PCo2, while the right-hand plot shows PCo1 and PCo3.

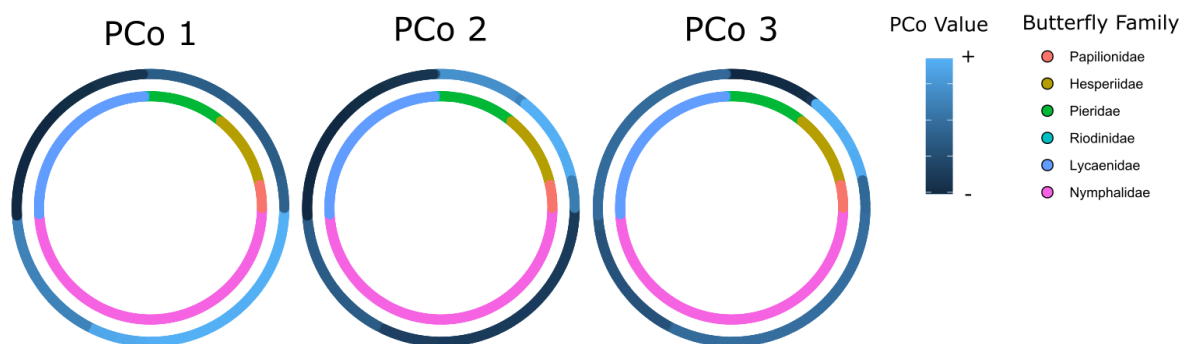

**Supplementary Fig.5 | Circular phylogeny of PCo values<sup>4</sup>**, plots show the three principal coordinates (PCos) for the 6 European butterfly families in relation to the shorter phylogeny. Colour values for the inner circle denote the butterfly family and colour values for the outer circle denote the PCo value with lighter blue indicating positive values (+) and darker values denoting negative (-).

## 93 Influence of sex on motion confusion metrics

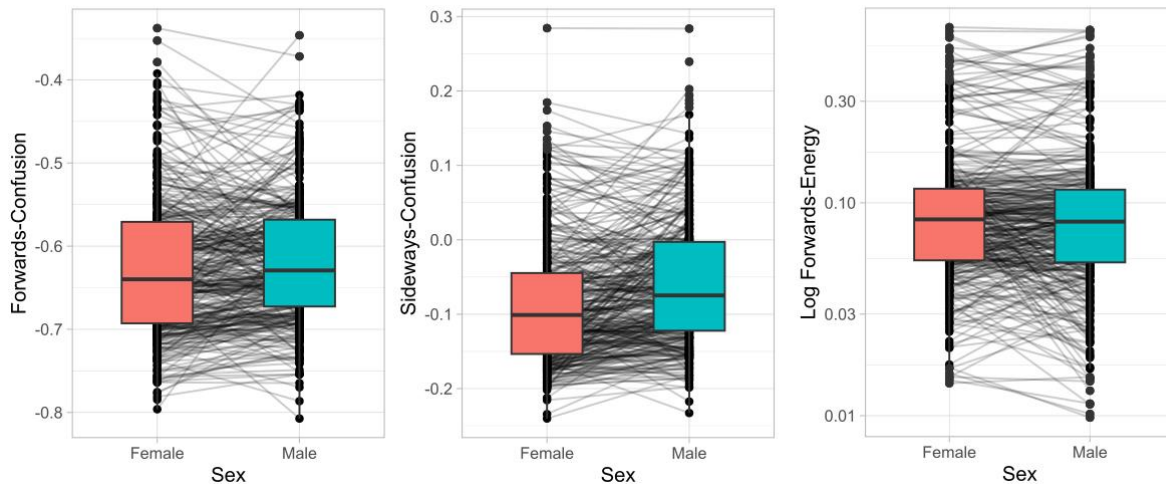

**Supplementary Fig.6 | Influence of sex on butterfly motion confusion for flapping flight,** each plot shows a boxplot for each of the two sexes and points with lines linking members of the same species.

Given that many butterfly species were illustrated as sexually dimorphic in appearance (358 of our 397 species) and males are frequently more contrasting in appearance than females, we opted to compare our three motion confusion metrics between males and females (See Supplementary Fig.6). To compare each sex we used linear mixed models with the motion confusion metric as the response variable and the sex as the predictor variable with the species binomial as a random effect.

Males were found to have no significant difference in forwards-confusion (male vs female, forwards-confusion:  $\beta = 0.006$ ,  $t \text{ value}_{357} = 1.82$ ,  $p = 0.0696$ ), marginally lower forwards-energy than females (male vs female, forwards-energy:  $\beta = -0.057$ ,  $t \text{ value}_{357} = -2.073$ ,  $p = 0.039$ ), and significantly greater sideways confusion (male vs female, sideways-confusion:  $\beta = 0.025$ ,  $t \text{ value}_{357} = 6.49$ ,  $p < 0.001$ ).

## 112 Influence of patterning and gliding on motion confusion metrics

To confirm our results for the influence of patterning on motion confusion in butterflies for the real butterfly takeoffs, we repeated our comparison of motion confusion measures for butterflies with their natural wing patterns and those without their wing patterns (white and averaged wing luminance). Numerous butterfly species, in particular larger species, undergo periods of unpowered flight where the wings are held open in a glide. These periods of differential patterns of biological motion are likely to influence the intensity of motion in

different directions and as a result motion confusion. As our 3D blender model allowed us to render butterfly flights with and without flapping flight we also quantified how wing patterning influenced the EMD when gliding (no flapping).

To compare the effects of patterning and gliding for each motion confusion metric we used linear mixed models. The confusion metric was given as the response variable, and both the pattern treatment (patterned, averaged, or white), the flight method (gliding or flapping) and the interaction between them were used as predictor variables. The unique morphotype of the butterfly was used as a random effect.

As with our real butterflies patterning increased motion confusion compared to the unpatterned treatments, however motion confusion was in some instances higher for the averaged butterflies when the butterflies near perfectly matched the background average (See Supplementary Fig.7 and Table 4-6). Flapping flight was found to be integral to the generation of forwards-confusion effects with the level of backward motion detected being near zero in the absence of wing movement. Meanwhile gliding exacerbated the difference between patterned and the unpatterned treatments for sideways-confusion and increased the level of forward-energy across all treatments (given the reduction in movement in alternative directions),but did not interact with patterning for forward-energy. Outliers for flapping flight where averaged butterflies caused high degrees of forwards and sideways motion confusion were due to instances where the butterflies matched the luminance of the patternless background (See Supplementary Fig. 8).

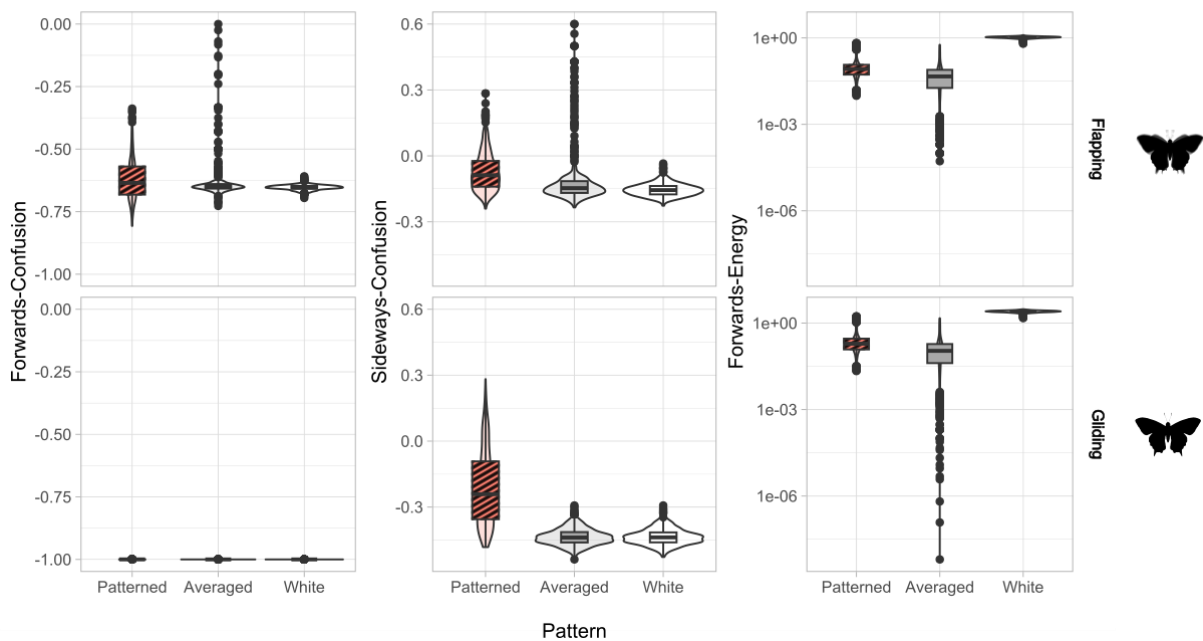

**Supplementary Fig.7 | Influence of pattern and gliding on motion confusion metrics**, levels of forwards-confusion, sideways-confusion, and forwards-energy for simulated butterfly flight when flapping their wings (above) and when their wings are static (gliding). Butterflies were rendered either with patterns, their averaged luminance or as white.

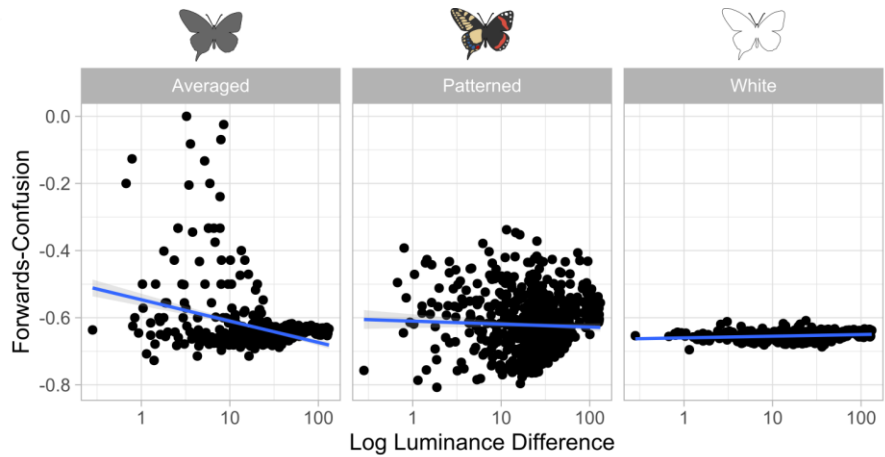

**Supplementary Fig.8 | Influence of background match on motion confusion metrics**, how does log difference in luminance from the background influence motion confusion for the three pattern treatments, averaged, patterned, and white.

**Supplementary Table 4 | Linear mixed model for forwards-confusion, gliding and pattern type**

| Contrast                       | Estimate | SE    | DF   | T ratio  | P value |
|--------------------------------|----------|-------|------|----------|---------|
| Patterned vs Averaged          | -0.012   | 0.002 | 3780 | -5.217   | <0.001  |
| Patterned vs White             | -0.031   | 0.002 | 3780 | -13.739  | <0.001  |
| Gliding vs Flapping            | -0.378   | 0.002 | 3780 | -167.952 | <0.001  |
| Patterned vs Average : Gliding | 0.012    | 0.002 | 3780 | 3.635    | <0.001  |
| Patterned vs White : Gliding   | 0.031    | 0.002 | 3780 | 9.659    | <0.001  |

**Supplementary Table 5 | Linear mixed model for sideways-confusion, gliding and pattern type**

| Contrast                       | Estimate | SE    | DF   | T ratio | P value |
|--------------------------------|----------|-------|------|---------|---------|
| Patterned vs Averaged          | -0.044   | 0.004 | 3780 | -11.05  | <0.001  |
| Patterned vs White             | -0.082   | 0.004 | 3780 | -20.54  | <0.001  |
| Gliding vs Flapping            | -0.143   | 0.004 | 3780 | -35.51  | <0.001  |
| Patterned vs Average : Gliding | -0.177   | 0.004 | 3780 | -31.21  | <0.001  |



|                              |        |       |      |        |        |
|------------------------------|--------|-------|------|--------|--------|
| Patterned vs White : Gliding | -0.140 | 0.004 | 3780 | -24.55 | <0.001 |
|------------------------------|--------|-------|------|--------|--------|

**Supplementary Table 6 | Linear mixed model for forwards-energy, gliding and pattern type**

| Contrast                       | Estimate | SE    | DF   | T ratio | P value |
|--------------------------------|----------|-------|------|---------|---------|
| Patterned vs Averaged          | -0.991   | 0.046 | 3780 | -21.658 | <0.001  |
| Patterned vs White             | 2.536    | 0.046 | 3780 | 55.412  | <0.001  |
| Gliding vs Flapping            | 0.862    | 0.046 | 3780 | 18.837  | <0.001  |
| Patterned vs Average : Gliding | -0.102   | 0.046 | 3780 | -1.578  | 0.115   |
| Patterned vs White : Gliding   | 0.018    | 0.046 | 3780 | 0.282   | 0.778   |

### Empirical image analysis of butterfly wing patterning

To quantify the appearance of butterfly wings we used image statistics maps for the forewing and hindwing to allow us to measure the mean, standard deviation, x-axis gradient, and y-axis gradient of each statistic. For the gradients a positive gradient indicates an increase in the map's value from left to right / top to bottom of the image, and a negative gradient indicates a decrease. To illustrate how these maps work we provide examples for three butterfly wings (See Supplementary Fig 8). For each map the largest spatial scale,  $s_6$ , was equivalent to  $\frac{1}{4}$  the square root of the wings area in pixels.

For each butterfly, metrics are split between the forewing and hindwing, e.g. fw.pat.E.mean is the mean energy for the forewing and hw.pat.VH.stdev is the variation in vertical horizontal

185 orientation for the hindwing. Pat stands for patterning measure and is used to distinguish  
186 wing shape measures, .shp.

187

188 L = luminance, P =periodicity, VH = vertical-horizontal, OA = obtuse - acute, and DR =  
189 directionality.

190

#### 191 **Luminance map -**

192 Simply created by converting the image from sRGB to blue-tit double cone quantum catch.

193

#### 194 **Periodicity map -**

195 For each pixel, periodicity is calculated as the weighted average spatial scale ( $S=\{s_1,s_2$   
196  $,\dots,s_6\}$ ), where each scale is weighted by the absolute value of the difference of gaussian  
197 (DoG) output. Higher periodicity (values closer to 1) indicate larger spatial scales.

198

199 Px = pixel value

200 s = scale

201  $wS = \sum_{s \in S} \frac{abs(px)s}{s} = \text{Weighted Sum}$

202  $E = \sum_{s \in S} abs(px)s = \text{Total Energy}$

203  $\text{Periodicity} = \frac{wS}{E}$

204

#### 205 **Energy map -**

206 For each pixel, energy is calculated as the sum absolute value of each pixel across spatial  
207 scales ( $S=\{s_1,s_2,\dots,s_6\}$ ).

208

209 px = pixel value

210 s = scale

211  $E = \sum_{s \in S} abs(px)s = \text{Total Energy}$

212

#### 213 **VH, OA & Directionality maps-**

214 Unlike periodicity and energy, these metrics use Gabor filters at six orientations (0, 30, 60,  
215 90, 120, and 150 degrees) but at the same six spatial scales as the DoG. These orientations  
216 are then converted into spatial maps in four different directions by calculating the energy  
217 across each orientation.

218

219 px = pixel value

220

221 a = angle in radians

222

223  $V(0 \text{ degrees}) = \sum_{s \in S} \sin(a) * abs(px)s$   
 224  $H(90 \text{ degrees}) = \sum_{s \in S} \cos(a) * abs(px)s$   
 225  $A(135 \text{ degrees}) = \sum_{s \in S} \sin(a * \frac{\pi}{4}) * abs(px)s$   
 226  $O(135 \text{ degrees}) = \sum_{s \in S} \cos(a * \frac{\pi}{4}) * abs(px)s$   
 227 Then each image (V, H, A, O) is used to create the following image statistics map. VH where  
 228 each pixel is the value for V - H, OA where each pixel is the value of O - A, and  
 229 Directionality where each pixel is the value is  $\sqrt{(VH^2 + OA^2)} - E$ , with positive values being  
 230 more directional.  
 231

**a. Peacock butterfly (*Aglaia io*)**

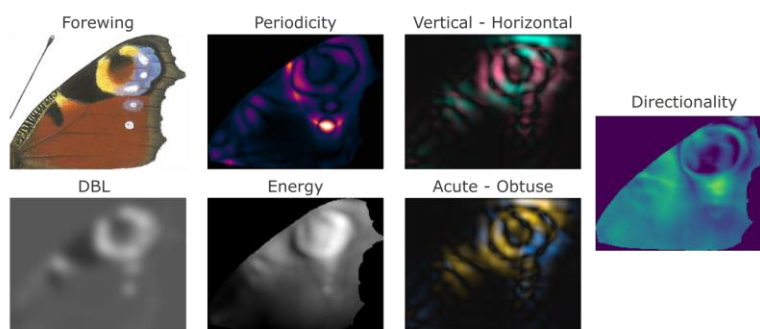

**b. Plain tiger (*Danaus chrysippus*)**

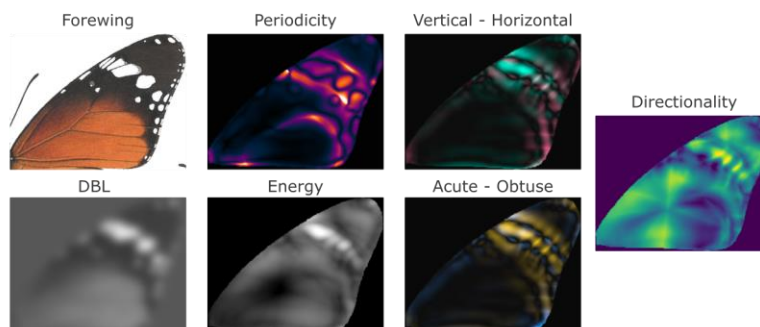

**c. European swallowtail (*Papilio machaon*)**

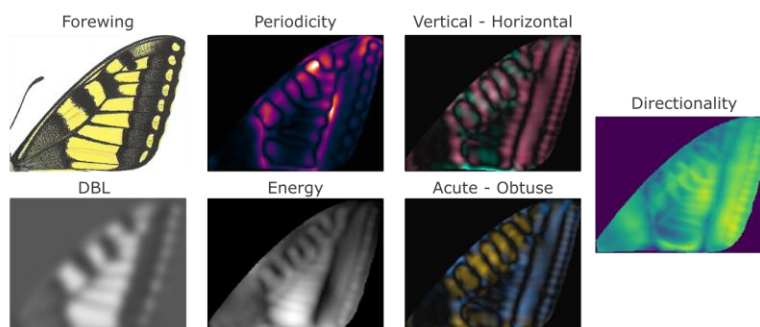

232  
233

234 **Supplementary Fig.9 | Image statistics maps**, example image statistic maps for three different  
 235 butterfly species. DBL, blue-tit cone catch for the wing downscaled so that the ¼ the wings area was  
 236 64 pixels. Lighter values indicate lighter regions. Periodicity, a spatial scale map where brighter values

indicate higher spatial frequencies. Energy, brighter values indicate regions of greater internal contrast from the rest of the wing. Vertical - Horizontal, shows VH where red values are more vertical and green values are more horizontal. Acute - Obtuse, shows OA where yellow values are closer to 135 degrees and blue values are closer to 45 degrees. Directionality, where lighter yellow values indicate more directional patterns.

**Random forests for motion confusion metrics**

See empirical image analysis of butterflies above for pattern variable denotation. Butterfly phylogeny is given using principal coordinates (PCos) 1-3.

**Supplementary Table 7 | SHAP table for forwards-confusion.** Variables are ordered by absolute mean SHAP value.

| Feature        | Node purity | Mean SHAP ± std dev |
|----------------|-------------|---------------------|
| fw.pat.L.stdev | 0.6014      | 0.0051 ± 0.0109     |
| fw.pat.E.mean  | 0.6713      | 0.0046 ± 0.0101     |
| hw.pat.VH.mean | 0.3468      | 0.0042 ± 0.0112     |
| hw.pat.L.mean  | 0.5995      | 0.0038 ± 0.0157     |
| PCo3           | 0.1752      | -0.0021 ± 0.0054    |
| fw.pat.VH.mean | 0.4878      | 0.0019 ± 0.0135     |
| hw.shp.rough   | 0.1854      | 0.0018 ± 0.0047     |
| fw.pat.L.mean  | 0.2887      | 0.0014 ± 0.0058     |
| hw.pat.L.x     | 0.1802      | 0.0012 ± 0.0046     |
| fw.pat.E.x     | 0.2406      | 0.0012 ± 0.0075     |
| PCo1           | 0.1950      | 0.001 ± 0.0031      |
| hw.pat.P.mean  | 0.1343      | -0.0005 ± 0.0038    |

|                |        |                  |
|----------------|--------|------------------|
| fw.pat.L.x     | 0.2393 | -0.0003 ± 0.004  |
| fw.col.by.mean | 0.2451 | 0.0002 ± 0.0069  |
| PCo2           | 0.1347 | -0.0001 ± 0.0026 |

**Supplementary Table 8 | SHAP table for sideways-confusion.** Variables are ordered by absolute mean SHAP value.

| Feature        | Node purity | Mean SHAP ± std dev |
|----------------|-------------|---------------------|
| hw.pat.VH.mean | 0.8423      | 0.0111 ± 0.0272     |
| hw.pat.L.mean  | 1.1025      | 0.0054 ± 0.0234     |
| body.length    | 0.3049      | 0.0024 ± 0.0104     |
| fw.pat.L.mean  | 0.7927      | 0.002 ± 0.0161      |
| hw.pat.P.stdev | 0.3445      | 0.0018 ± 0.0066     |
| hw.shp.rough   | 0.3436      | 0.0013 ± 0.0108     |
| PCo3           | 0.1722      | -0.0011 ± 0.0046    |
| hw.pat.DR.mean | 0.1333      | 0.0011 ± 0.0032     |
| fw.pat.VH.mean | 0.2764      | 0.0011 ± 0.0067     |
| hw.pat.L.x     | 0.2066      | 0.0008 ± 0.0074     |
| hw.pat.L.stdev | 0.3355      | 0.0007 ± 0.0071     |
| fw.shp.length  | 0.1267      | -0.0001 ± 0.0022    |
| hw.shp.length  | 0.1788      | -0.0001 ± 0.0023    |
| PCo2           | 0.2653      | -0.0001 ± 0.0055    |

hw.pat.P.x                      0.2025                      0 ± 0.0048

**Supplementary Table 9 | SHAP table for forwards-energy.** Variables are ordered by absolute mean SHAP value.

| Feature        | Node purity | Mean SHAP ± std dev |
|----------------|-------------|---------------------|
| hw.pat.L.mean  | 3.7952      | 0.0081 ± 0.0641     |
| fw.pat.L.mean  | 2.5395      | 0.0052 ± 0.0396     |
| fw.pat.E.mean  | 0.4418      | 0.0026 ± 0.0099     |
| fw.pat.L.stdev | 0.2084      | 0.0022 ± 0.0079     |
| hw.pat.L.stdev | 0.0936      | 0.0019 ± 0.0051     |
| hw.pat.E.mean  | 0.0858      | 0.0011 ± 0.0047     |
| PCo3           | 0.5321      | 0.001 ± 0.0057      |
| fw.pat.L.x     | 0.6294      | 0.0007 ± 0.0071     |
| hw.pat.P.x     | 0.0745      | 0 ± 0.0015          |

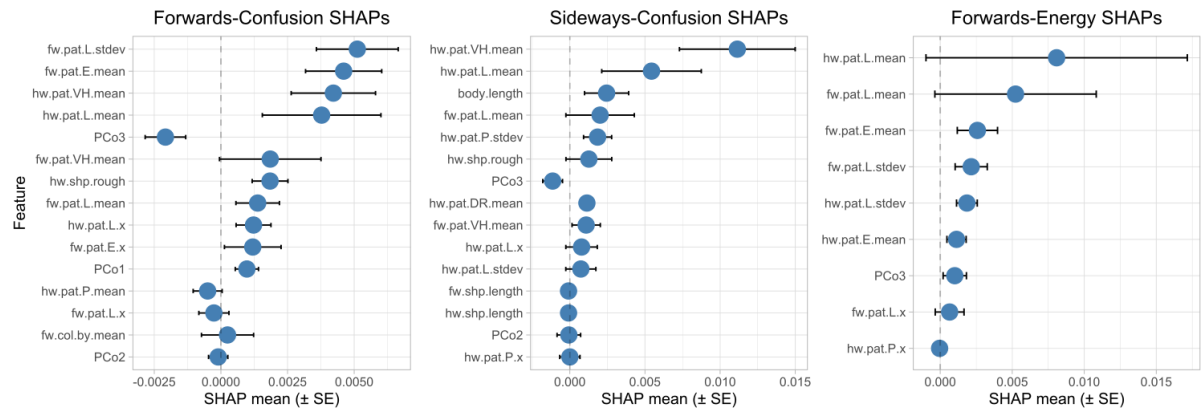

**Supplementary Fig.10 | SHAP values for motion confusion metrics**, the ranked SHAP values for the reduced forest tree for forwards-confusion, sideways-confusion, and forwards-energy. Positive values indicate instances where the feature increases the motion confusion metric and negative values indicate instances where the variable decreases it.

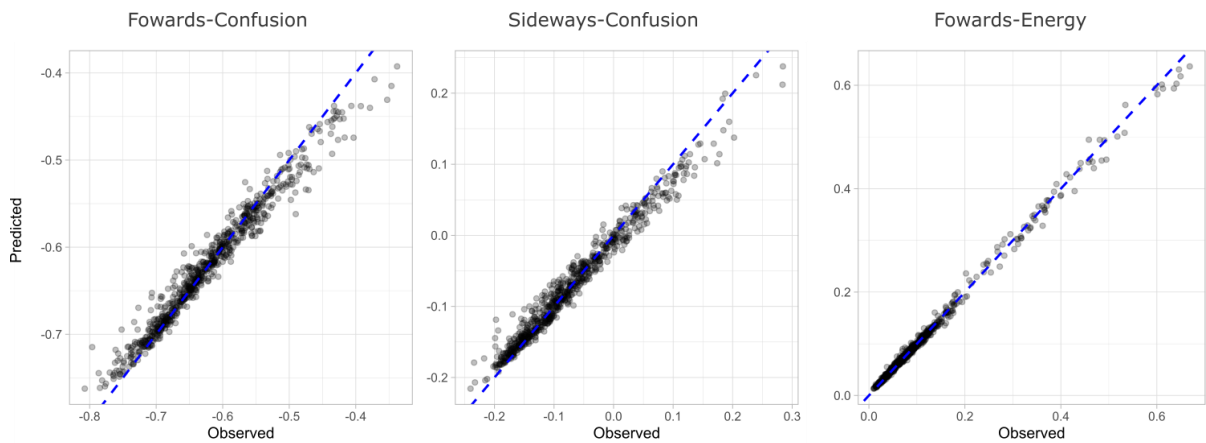

**Supplementary Fig.11 | Random forest accuracy plots**, the predicted motion confusion values against the observed motion confusion values for forwards-confusion, sideways-confusion and forwards-energy when using our reduced model.

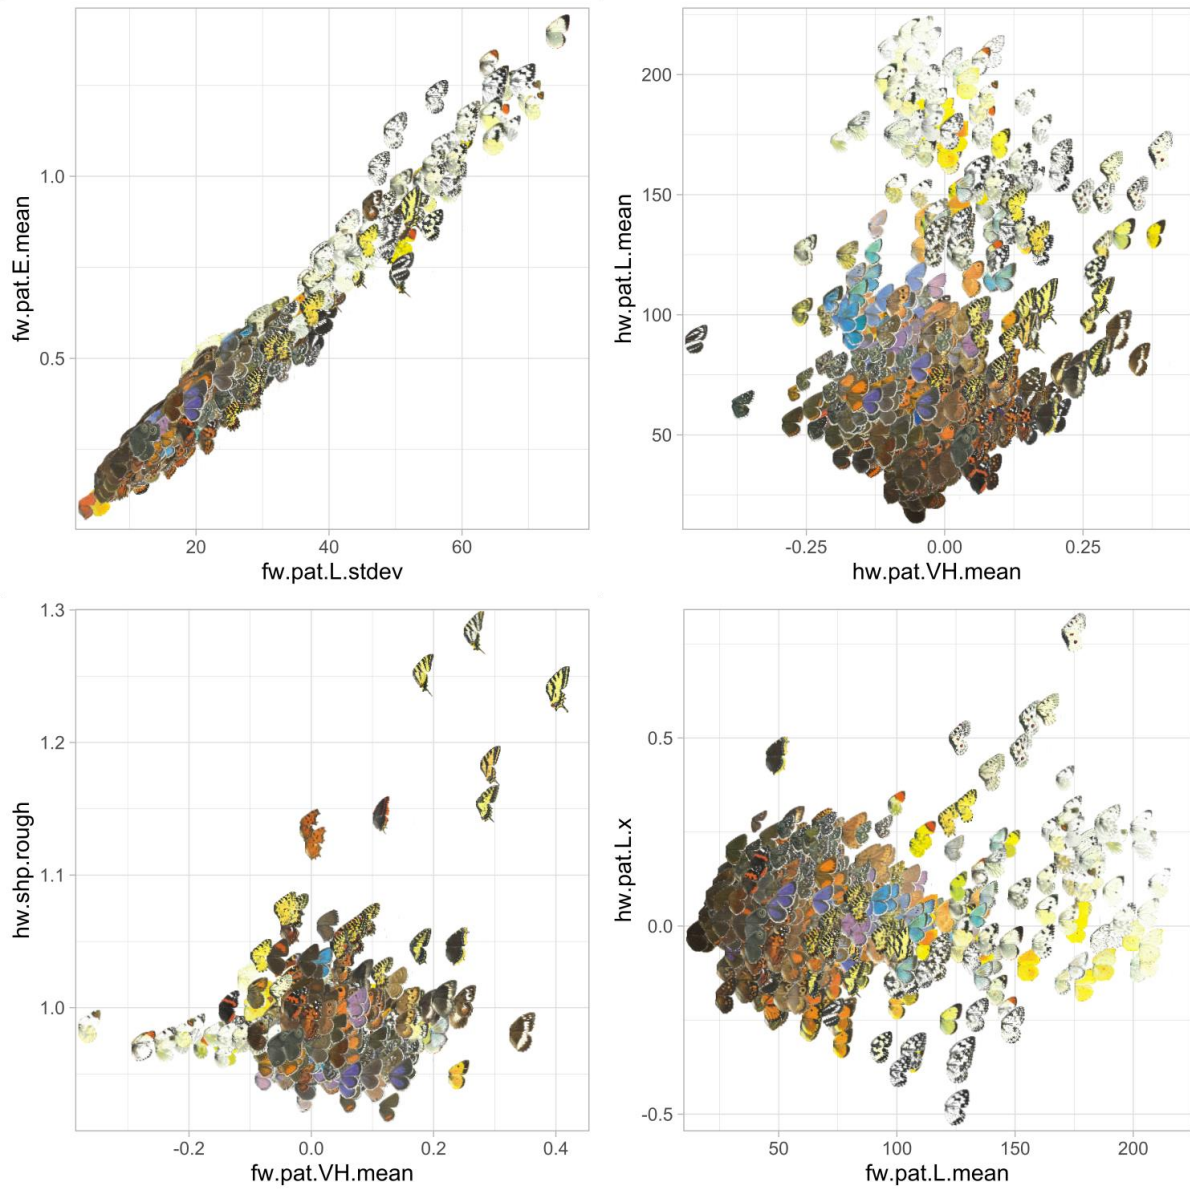

**Supplementary Fig.12 | SHAP features for forwards-confusion**, shows the top 8 SHAPs for forwards-confusion not including PCos. Each point shows the wing images for the specific butterfly at that point.



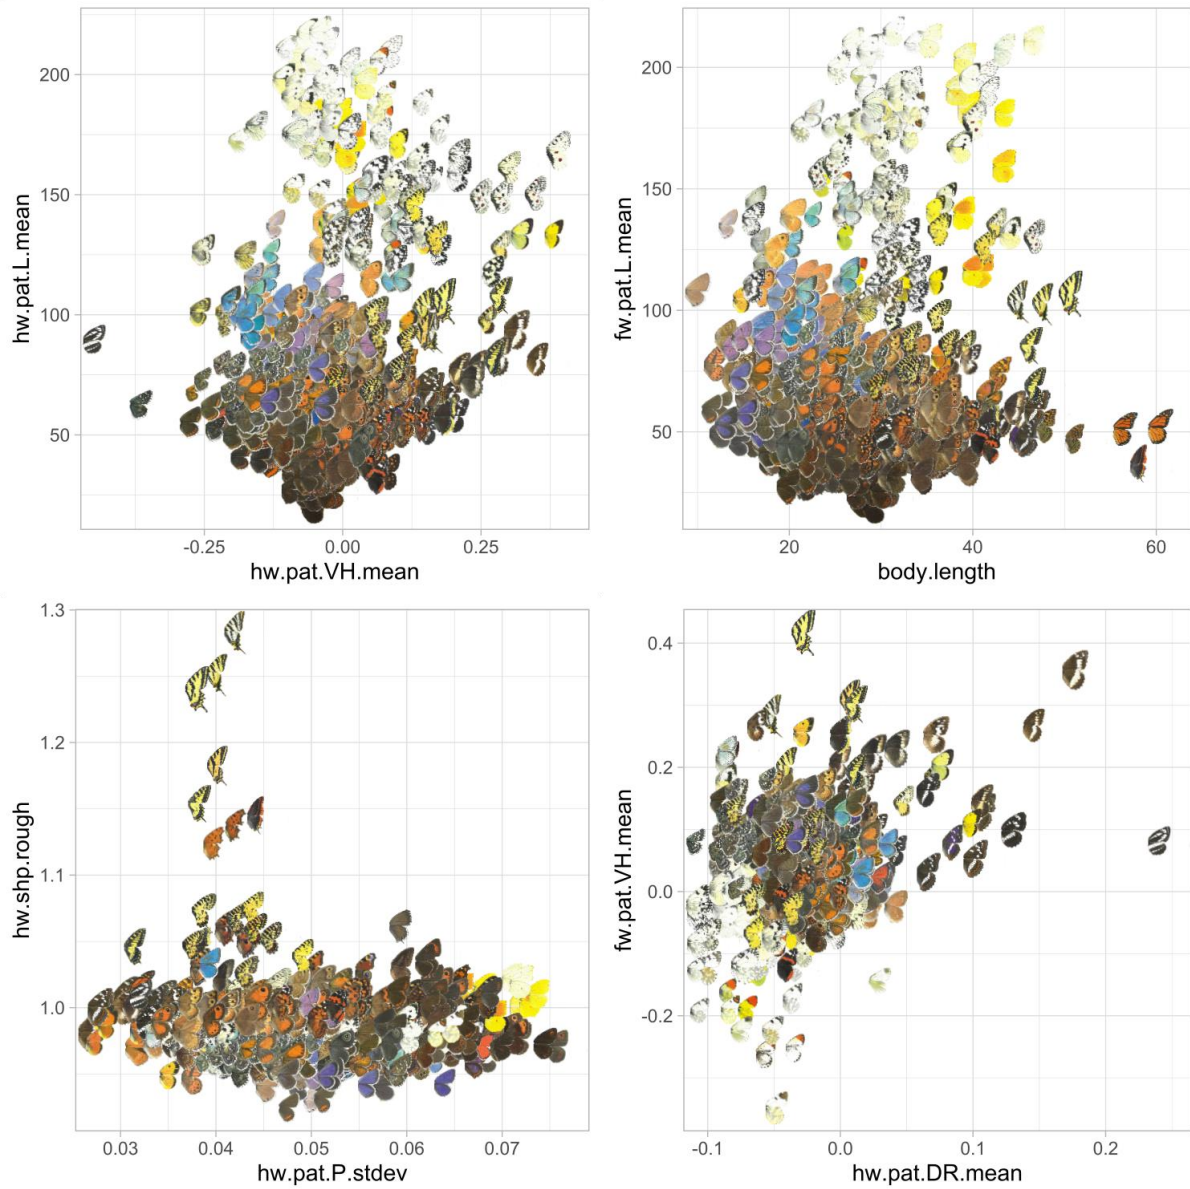

**Supplementary Fig.13 | SHAP features for sideways-confusion**, shows the top 8 SHAPs for sideways-confusion not including PCos. Each point shows the wing images for the specific butterfly at that point.

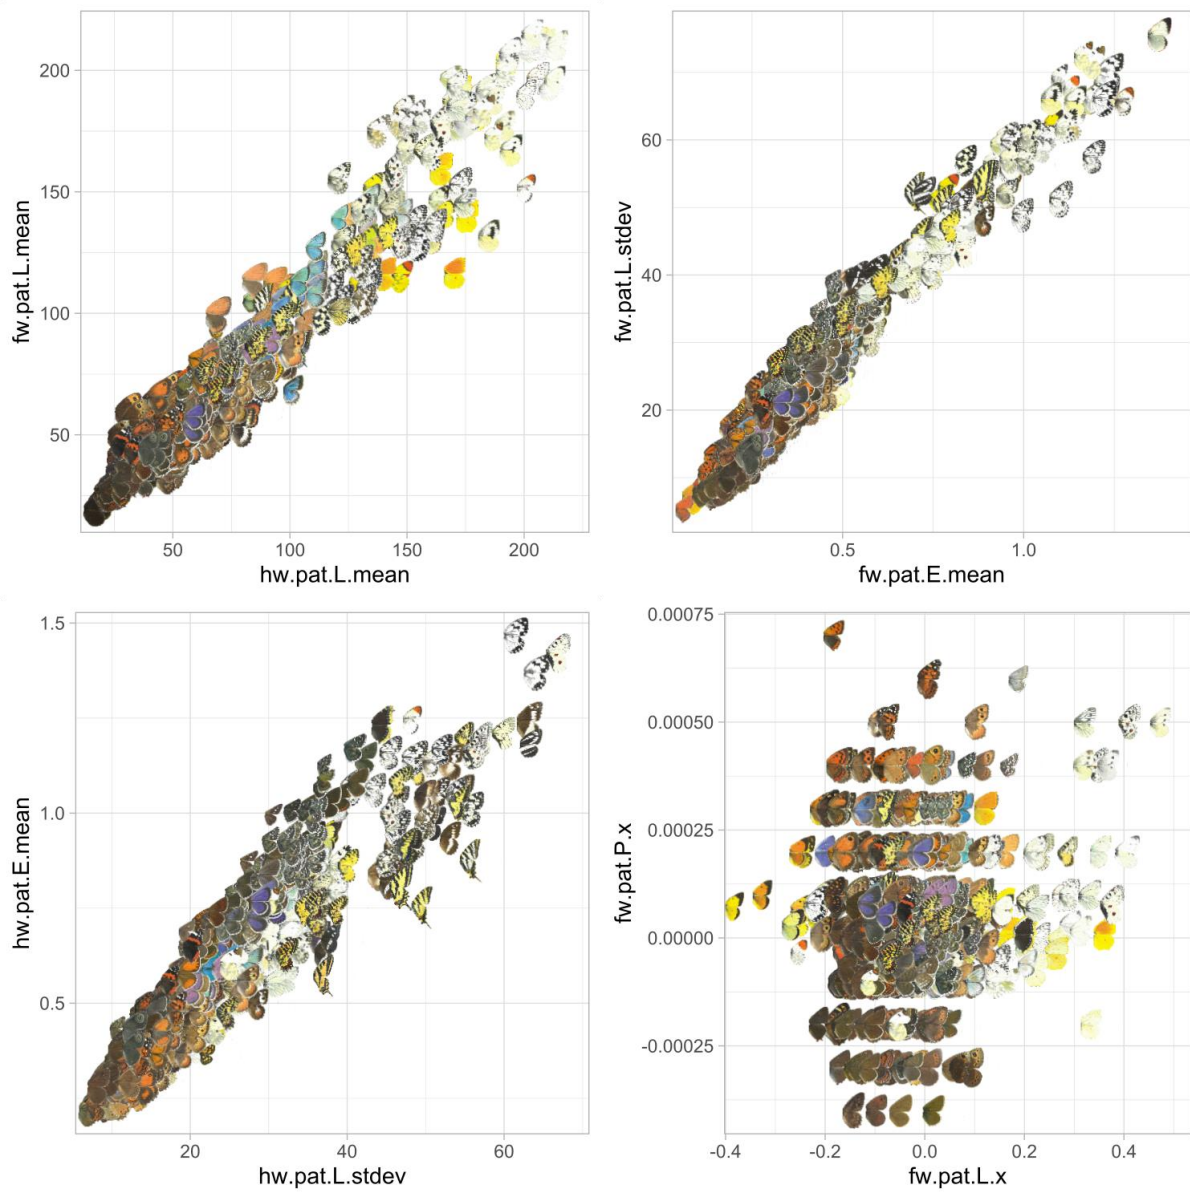

**Supplementary Fig.14 | SHAP features for forwards-energy**, shows the top 8 SHAPs for forwards-confusion not including PCos. Each point shows the wing images for the specific butterfly at that point.

## Butterfly artificial evolution with genetic algorithms

### Butterfly pattern generation

Butterfly wing pattern generation was derived from the pattern generator included in the CamoEvo toolbox v2.0 [https://github.com/GeorgeHancock471/CamoEvo-v2.0-2022\\_Plugins](https://github.com/GeorgeHancock471/CamoEvo-v2.0-2022_Plugins). This system uses reaction-diffusion patterns to generate biologically relevant patterns that can be evolved under different selection pressures.

The pattern generator was modified to allow for separate generation of pattern dimensions for the forewing, hindwing and body using masks (see supplementary Fig.15), to add a sin convolution function with different strengths to create eye spot like patterns, two separate colours for the maculation and the background (note butterflies were achromatic for this experiment), and to produce asymmetric edge enhancement patterns (see supplementary Table 10 for full trait list).

#### Supplementary Table 10 | Gene function table for butterfly pattern generator

| Gene Label  | Function                                                   |
|-------------|------------------------------------------------------------|
| dim_for_xcp | Forewing reaction diffusion pattern x coordinate           |
| dim_for_ycp | Forewing reaction diffusion pattern y coordinate           |
| dim_for_wdt | Forewing reaction diffusion pattern selection width        |
| dim_for_asr | Forewing reaction diffusion pattern selection aspect ratio |
| dim_for_agl | Forewing reaction diffusion pattern rotation               |
| dim_hnd_xcp | Hindwing reaction diffusion pattern x coordinate           |
| dim_hnd_ycp | Hindwing reaction diffusion pattern y coordinate           |
| dim_hnd_wdt | Hindwing reaction diffusion pattern selection width        |
| dim_hnd_asr | Hindwing reaction diffusion pattern selection aspect ratio |

|             |                                                                                                        |
|-------------|--------------------------------------------------------------------------------------------------------|
| dim_hnd_agl | Hindwing reaction diffusion pattern rotation                                                           |
| dim_bod_xcp | Body reaction diffusion pattern x coordinate                                                           |
| dim_bod_ycp | Body reaction diffusion pattern y coordinate                                                           |
| dim_bod_wdt | Body reaction diffusion pattern selection width                                                        |
| dim_bod_asr | Body reaction diffusion pattern selection aspect ratio                                                 |
| dim_bod_agl | Body reaction diffusion pattern rotation                                                               |
| ptn_grd_cvr | Pattern area cover                                                                                     |
| ptn_grd_sig | Pattern gradient blur                                                                                  |
| ptn_grd_hgt | Pattern gradient radius                                                                                |
| ptn_grd_xps | Pattern gradient x coordinate                                                                          |
| ptn_grd_yps | Pattern gradient y coordinate                                                                          |
| ptn_grd_sin | Pattern sin convolution, used to produce eye spot like patterns                                        |
| ptn_bil_sub | Asymmetry noise subtraction before min = 0, for symmetrical patterns just adds noise to pattern shape. |
| ptn_bil_sig | Asymmetry noise blurring gaussian sigma, for symmetrical patterns just adds noise to pattern shape.    |
| ptn_bil_int | Asymmetry noise intensity level, for symmetrical patterns just adds noise to pattern shape.            |
| ptn_edg_sig | Wing edge, gaussian blur sigma of mask used to shape pattern to wing edge                              |
| ptn_edg_rto | Wing edge, ratio between positive and negative                                                         |
| ptn_edg_dfm | Wing edge, reform intensity                                                                            |
| eem_int_lvl | Edge enhancement internal intensity level                                                              |

|             |                                           |
|-------------|-------------------------------------------|
| eem_int_sig | Edge enhancement internal gaussian blur   |
| eem_int_exp | Edge enhancement internal expansion level |
| eem_int_xst | Edge enhancement internal x offset        |
| eem_int_yst | Edge enhancement internal y offset        |
| eem_ext_lvl | Edge enhancement external intensity level |
| eem_ext_sig | Edge enhancement external gaussian blur   |
| eem_ext_exp | Edge enhancement external expansion level |
| eem_ext_xst | Edge enhancement external x offset        |
| eem_ext_yst | Edge enhancement external y offset        |
| col_mc1_lmv | Maculation colour L* 1                    |
| col_mc1_rgv | Maculation colour a* 1                    |
| col_mc1_byv | Maculation colour b* 1                    |
| col_mc2_lmv | Maculation colour L* 2                    |
| col_mc2_rgv | Maculation colour a* 2                    |
| col_mc2_byv | Maculation colour b* 2                    |
| col_bg1_lmv | Background colour L* 1                    |
| col_bg1_rgv | Background colour a* 1                    |
| col_bg1_byv | Background colour b* 1                    |
| col_bg2_lmv | Background colour L* 2                    |
| col_bg2_rgv | Background colour a* 2                    |

|             |                                   |
|-------------|-----------------------------------|
| col_bg2_byv | Background colour $b^* 2$         |
| grd_mac_hgt | Maculation colour gradient radius |
| grd_mac_sig | Maculation colour gradient sigma  |
| grd_mac_sin | Maculation colour gradient sin    |
| grd_mac_agl | Maculation colour gradient angle  |
| grd_bgd_hgt | Background colour gradient radius |
| grd_bgd_sig | Background colour gradient sigma  |
| grd_bgd_sin | Background colour gradient sin    |
| grd_bgd_agl | Background colour gradient angle  |
| grd_blr_mac | Background colour gradient radius |
| spk_nm1_lgt | Speckling 1 light intensity       |
| spk_nm1_drk | Speckling 1 dark intensity        |
| spk_nm1_sig | Speckling 1 gaussian blur         |
| spk_nm1_ycd | Speckling 1 y coordinate          |
| spk_nm2_lgt | Speckling 2 light intensity       |
| spk_nm2_drk | Speckling 2 dark intensity        |
| spk_nm2_sig | Speckling 2 gaussian blur         |
| spk_nm2_ycd | Speckling 2 y coordinate          |

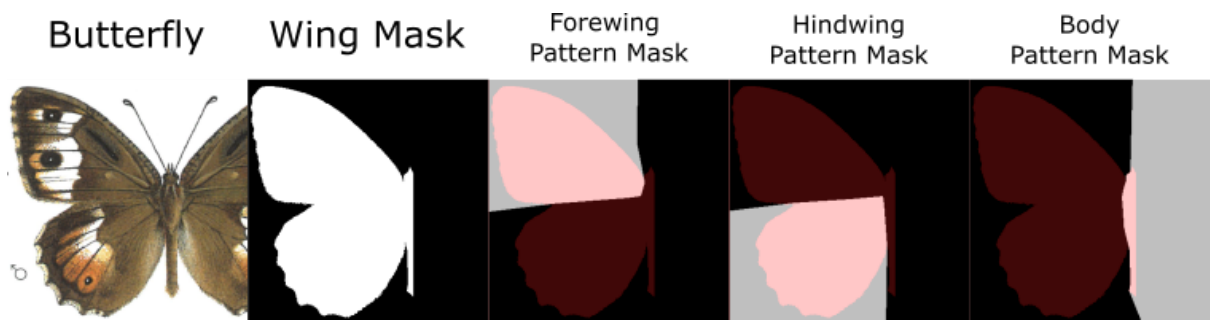

**Supplementary Fig.15 | Butterfly wing shape extraction**, shows how the wing shape masks and pattern area masks were made for a butterfly using a nymphalid as an example. First the wing was masked and then an area was drawn for the forewing, hindwing and body pattern. Red overlay shows the butterfly wing mask over the mask areas. White indicates a region where patterns are contained within.

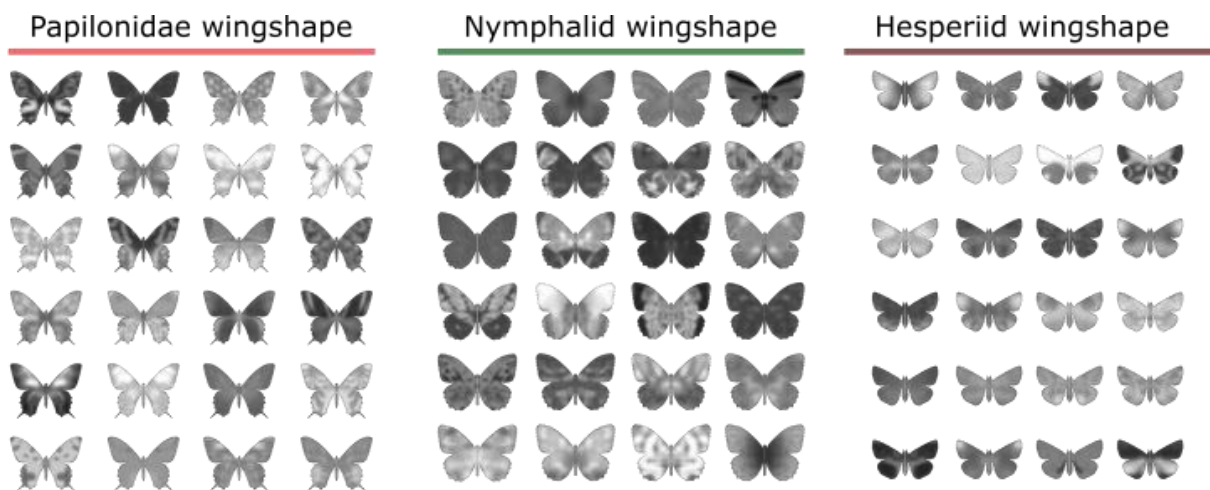

**Supplementary Fig.16 | Example wing patterns**, shows one whole population (N=24) for each of the three butterfly wing shapes used. All patterns are from the first generation (generation=0) where each of the genes is randomly generated in a uniform distribution from 0-1 for each gene.

### ImageGA settings

0  
custom  
24  
20  
uniform  
fraction  
0.6667  
0.3333  
0  
0.001

|     |                                     |
|-----|-------------------------------------|
| 372 | 0.005                               |
| 373 | 0.005                               |
| 374 | 0.33                                |
| 375 | 0.001                               |
| 376 | 0.005                               |
| 377 | 0.005                               |
| 378 | 0.33                                |
| 379 | 0                                   |
| 380 | 0                                   |
| 381 | 0                                   |
| 382 | 0                                   |
| 383 | 0                                   |
| 384 | 0                                   |
| 385 | 0.1                                 |
| 386 | true                                |
| 387 | true                                |
| 388 | true                                |
| 389 | random                              |
| 390 | 1                                   |
| 391 | incomplete                          |
| 392 | ranked_choice                       |
| 393 | random                              |
| 394 | none                                |
| 395 |                                     |
| 396 |                                     |
| 397 | <b>Evolved butterfly phenotypes</b> |
| 398 |                                     |



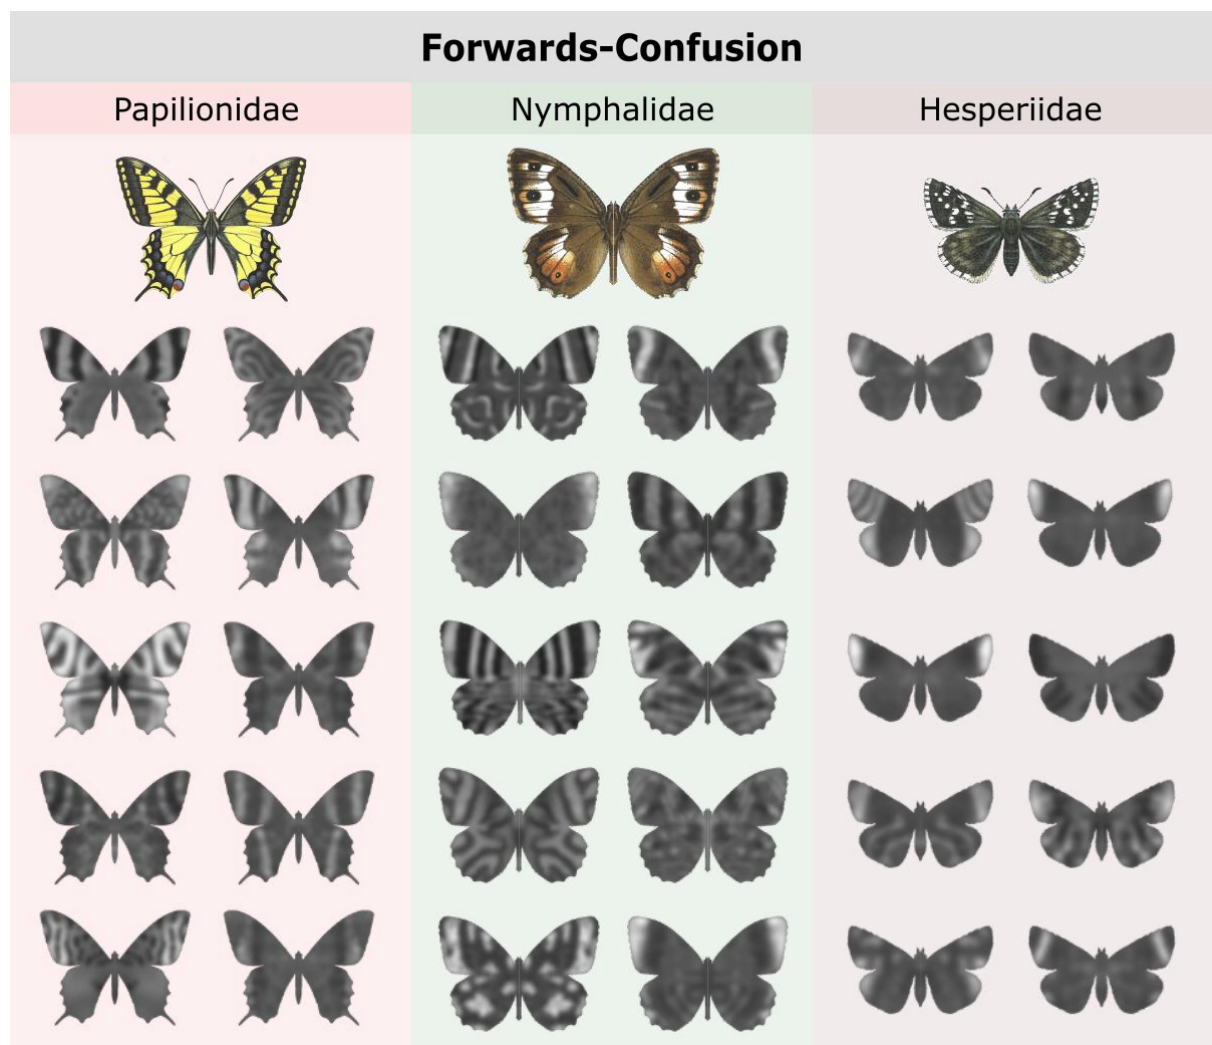

**Supplementary Fig.17 | Forwards-Confusion evolved butterflies**, showing one individual for each population evolved for forwards-confusion from the final generation (generation=20) and separated by the three wing shapes.

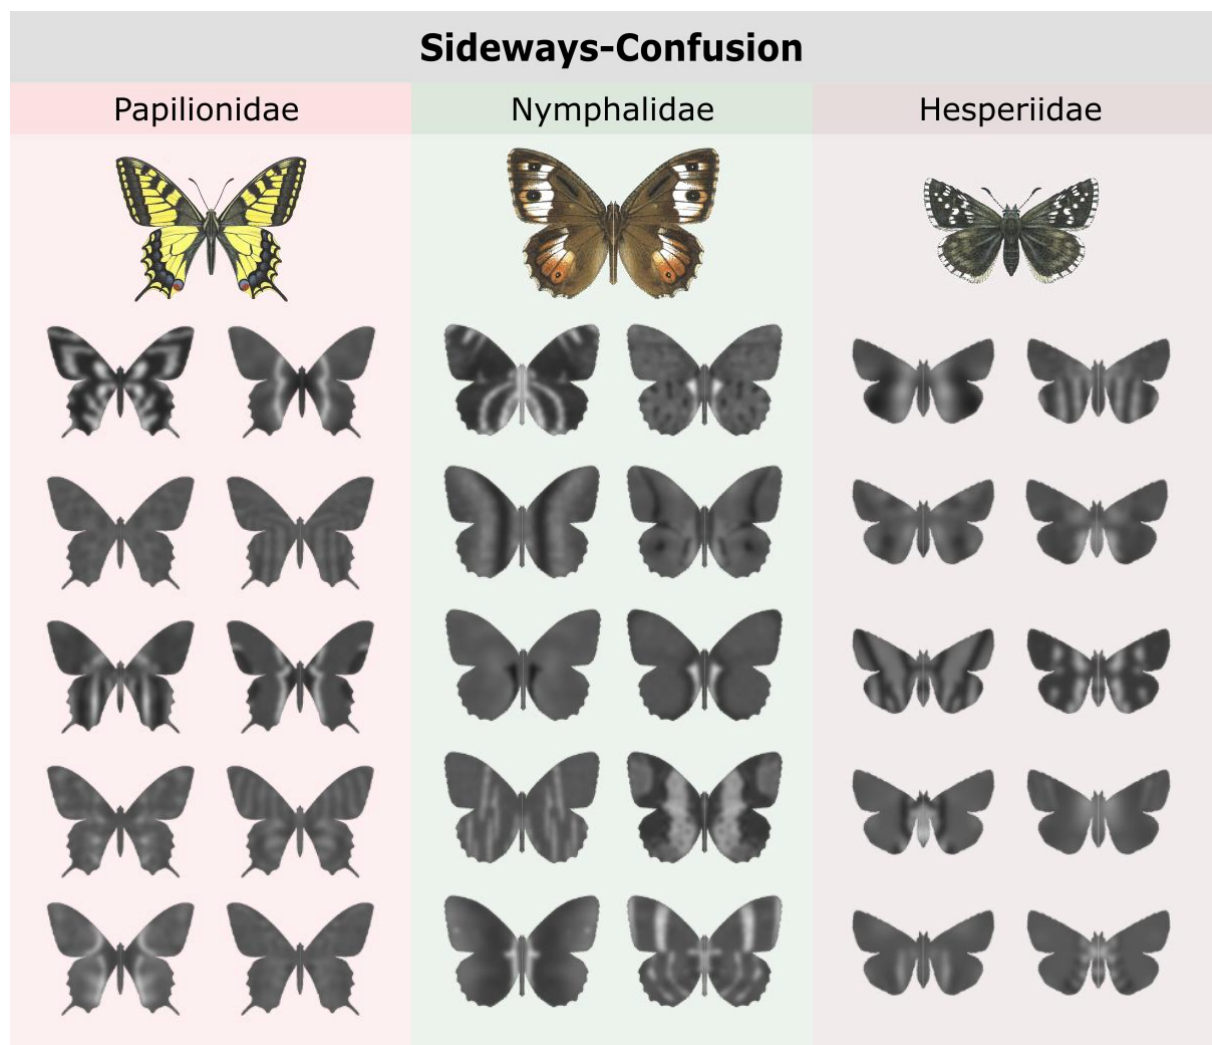

**Supplementary Fig.18 | Sideways-Confusion evolved butterflies**, showing one individual for each population evolved for sideways-confusion from the final generation (generation=20) and separated by the three wing shapes.

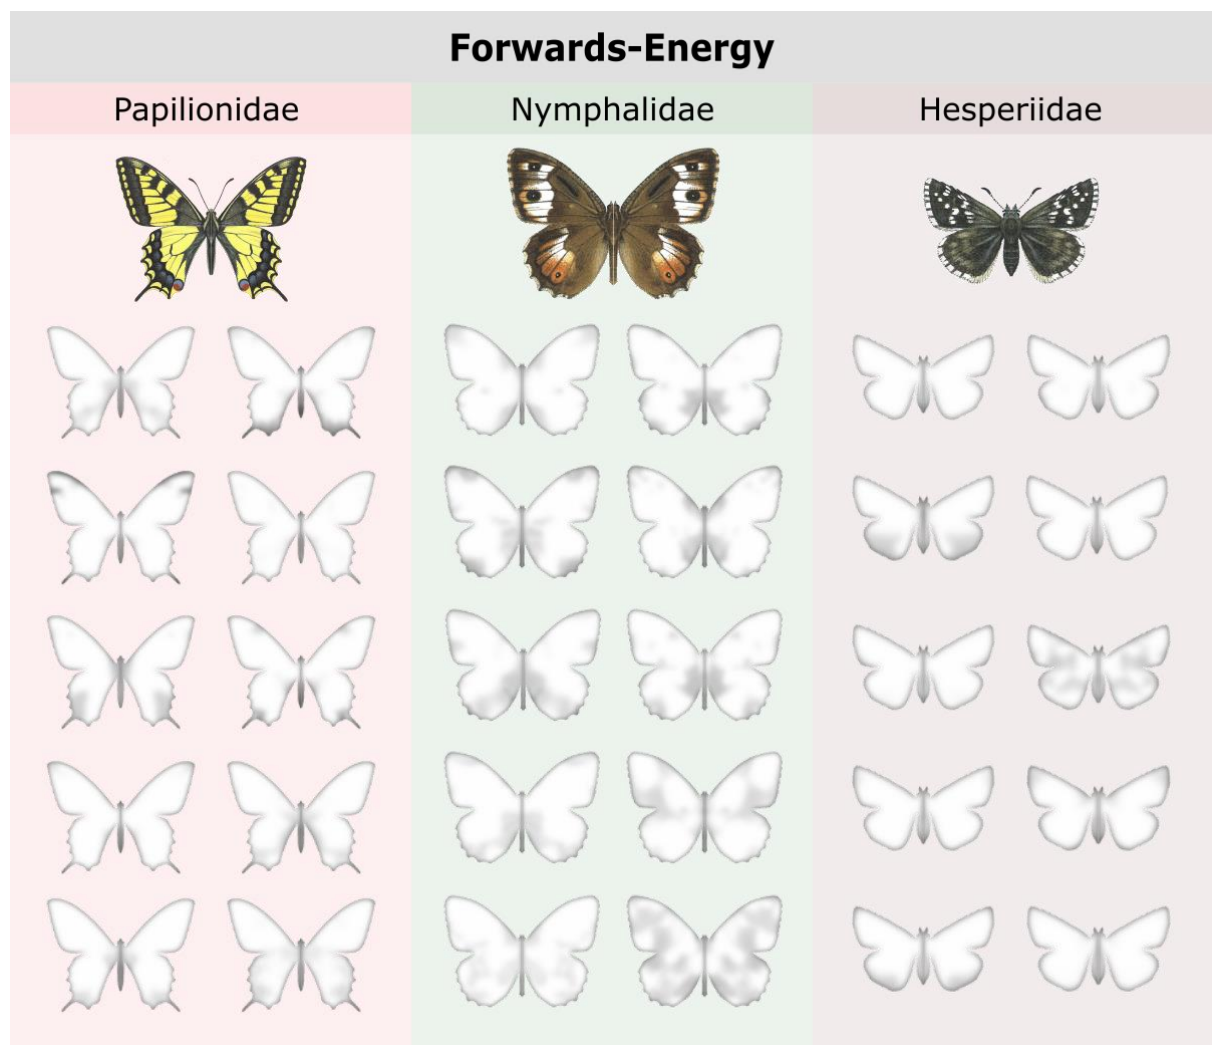

**Supplementary Fig.19 | Forwards-Energy evolved butterflies**, shows one individual for each population evolved for forwards-energy from the final generation (generation=20) and separated by the three wing shapes.

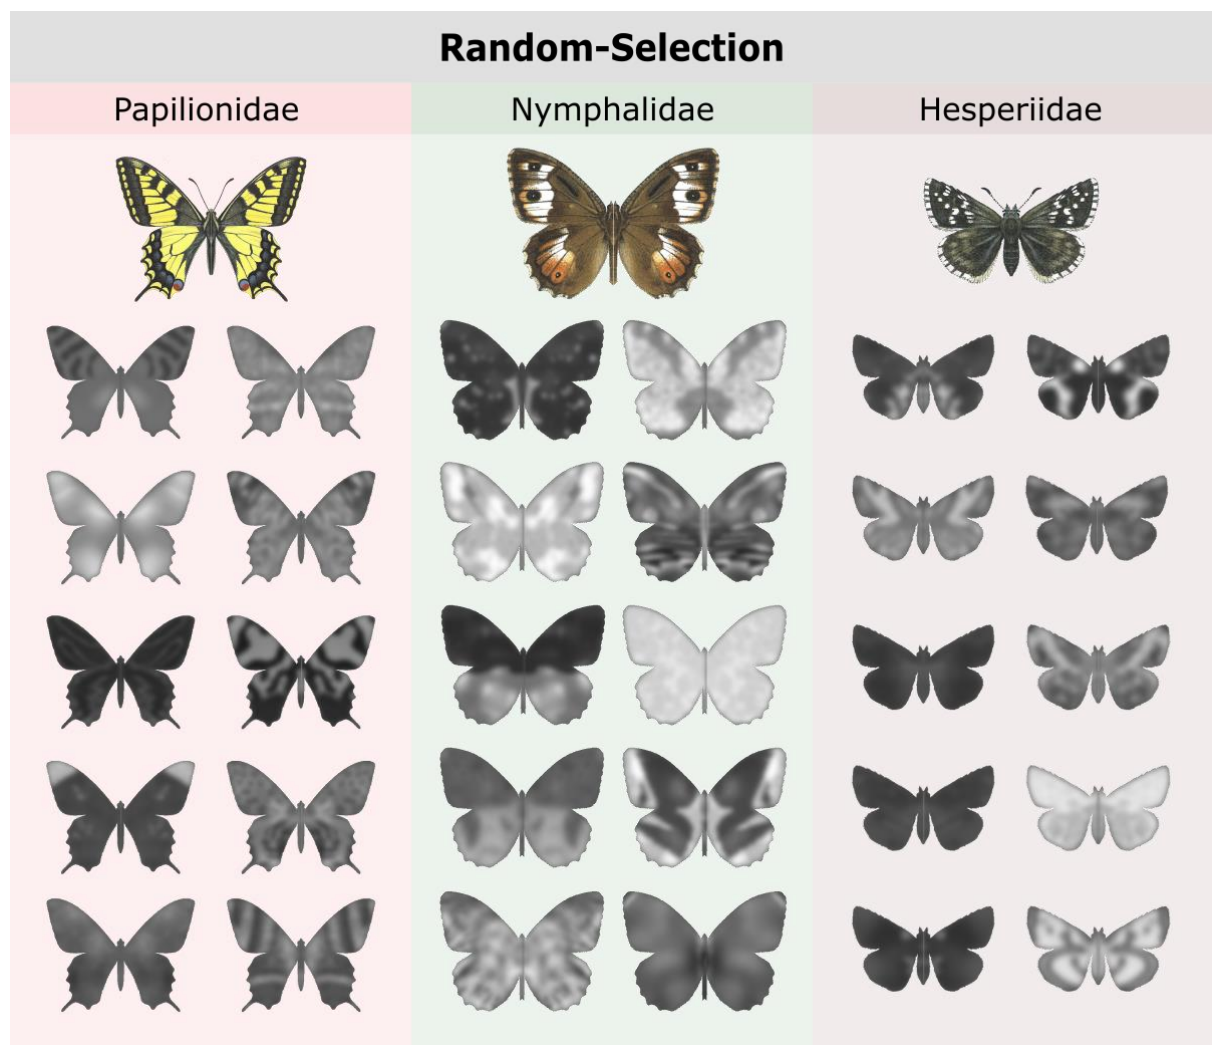

**Supplementary Fig.20 | Random-Selection evolved butterflies**, showing one individual for each population evolved with randomised fitness values from the final generation (generation=20) and separated by the three wing shapes.

**Influence of treatment on motion confusion metrics**

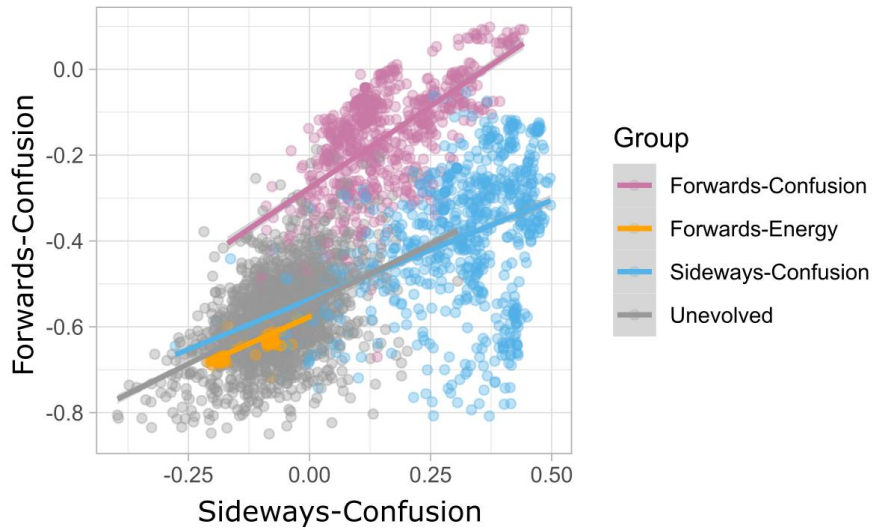

**Supplementary Fig.21 | Forwards- and sideways-confusion correlation**, shows the linear regression plot for forwards- and sideways-confusion for the unevolved generation 0 butterflies and the final generation 20 for the three different evolution treatments. Butterflies under random-selection were excluded as they weren't measured for EMD.

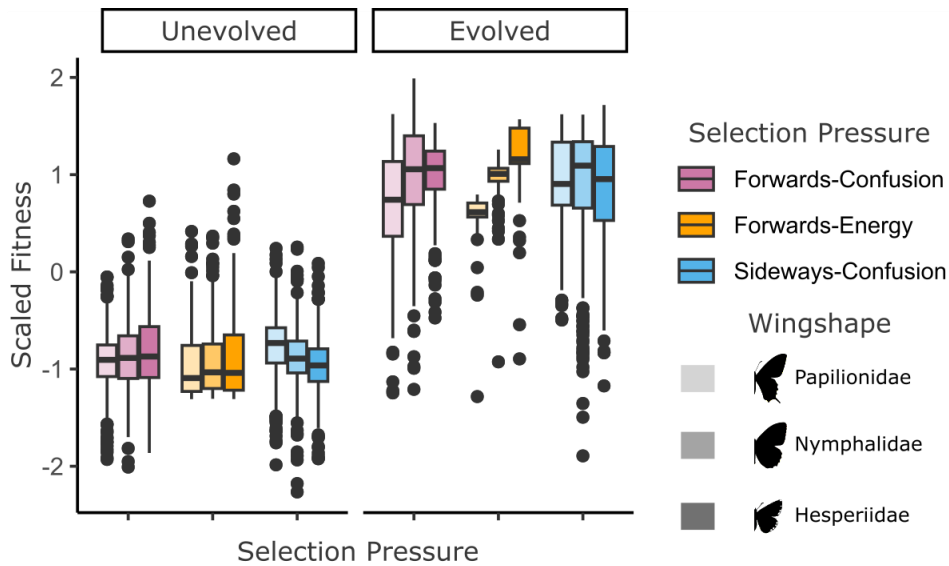

**Supplementary Fig.22 | Change in fitness between start and end**, shows the scaled (mean = 0, std dev = 1) fitness for the three evolution treatments for the three evolution treatments and separated by wingshape. Left to right and with decreasing luminance are the three wing shapes (Papilionidae, Nymphalidae, and Hesperidae)

Butterflies significantly improved in fitness across generations for all non-random treatments when tested using a linear model with scaled fitness as the response variable and

generation (start and end) as the predictor variable (end vs start,  $\beta = 1.788675$ ,  $t$  value = 185.2,  $SE = 0.010$ ,  $p < 0.001$  ). Butterflies under random-selection were excluded as they weren't measured for EMD.

## PCA loadings

**Supplementary Table 11 | Ordered image pattern feature loadings for PC1 and PC2 variables are sorted by their absolute contribution. PC1 is primarily pattern contrast on the forewing and hindwing and PC2 is primarily pattern orientation and**

| PC1             |          | PC2             |          |
|-----------------|----------|-----------------|----------|
| Feature         | Loading  | Feature         | Loading  |
| fw.pat.DR.stdev | 0.268563 | hw.pat.OA.x     | -0.29989 |
| hw.pat.E.mean   | 0.267379 | hw.pat.VH.x     | 0.282803 |
| fw.pat.E.mean   | 0.264071 | fw.pat.VH.x     | 0.278714 |
| fw.pat.VH.stdev | 0.263816 | hw.pat.OA.stdev | 0.258527 |
| fw.pat.OA.stdev | 0.263306 | fw.pat.L.mean   | -0.25602 |
| hw.pat.L.stdev  | 0.262894 | fw.pat.DR.x     | 0.23709  |
| fw.pat.L.stdev  | 0.262455 | fw.pat.DR.mean  | 0.23574  |
| hw.pat.VH.stdev | 0.258653 | hw.pat.DR.stdev | 0.209364 |
| hw.pat.DR.stdev | 0.258521 | fw.pat.P.stdev  | 0.207509 |
| hw.pat.E.stdev  | 0.255711 | hw.pat.L.mean   | -0.20327 |
| fw.pat.E.stdev  | 0.254993 | hw.pat.E.x      | 0.201842 |
| hw.pat.OA.stdev | 0.245247 | hw.pat.VH.stdev | 0.200999 |
| fw.pat.L.mean   | 0.181333 | fw.pat.L.x      | -0.1738  |
| hw.pat.L.mean   | 0.180075 | fw.pat.E.mean   | -0.16771 |
| fw.pat.L.x      | 0.15633  | fw.pat.L.stdev  | -0.1601  |
| fw.pat.P.stdev  | -0.13928 | fw.pat.OA.mean  | -0.1536  |
| hw.pat.P.stdev  | -0.13533 | hw.pat.E.stdev  | 0.151398 |
| hw.pat.P.mean   | -0.12265 | fw.pat.VH.mean  | 0.140332 |

|                |          |                 |          |
|----------------|----------|-----------------|----------|
| fw.pat.P.mean  | -0.12035 | hw.pat.E.mean   | 0.139249 |
| hw.pat.DR.mean | -0.05912 | hw.pat.DR.mean  | 0.12115  |
| fw.pat.E.x     | 0.055724 | hw.pat.DR.x     | 0.118256 |
| fw.pat.DR.x    | 0.055361 | hw.pat.L.x      | 0.117725 |
| fw.pat.VH.x    | 0.0539   | hw.pat.P.mean   | -0.11541 |
| hw.pat.P.x     | 0.049861 | fw.pat.P.mean   | 0.114024 |
| hw.pat.OA.mean | -0.04717 | fw.pat.E.x      | 0.112363 |
| hw.pat.OA.x    | -0.04444 | fw.pat.DR.stdev | -0.09109 |
| fw.pat.DR.mean | -0.04351 | fw.pat.OA.stdev | -0.09089 |
| hw.pat.DR.x    | 0.041132 | fw.pat.OA.x     | -0.09034 |
| hw.pat.VH.x    | 0.037225 | fw.pat.E.stdev  | -0.07976 |
| fw.pat.VH.mean | 0.033612 | hw.pat.L.stdev  | 0.070147 |
| hw.pat.L.x     | -0.02826 | hw.pat.VH.mean  | -0.06782 |
| fw.pat.P.x     | 0.025351 | hw.pat.P.stdev  | 0.062152 |
| fw.pat.OA.x    | 0.02347  | fw.pat.VH.stdev | -0.03231 |
| hw.pat.E.x     | 0.021196 | hw.pat.DR.y     | -0.02788 |
| fw.pat.OA.mean | 0.01417  | fw.pat.OA.y     | 0.018925 |
| hw.pat.VH.y    | 0.01213  | hw.pat.P.x      | -0.01756 |
| hw.pat.E.y     | 0.009363 | hw.pat.E.y      | -0.01744 |
| hw.pat.L.y     | -0.00881 | hw.pat.P.y      | 0.012326 |
| fw.pat.VH.y    | -0.00772 | fw.pat.E.y      | 0.010222 |
| fw.pat.DR.y    | -0.00724 | hw.pat.OA.mean  | -0.00961 |
| fw.pat.L.y     | 0.002425 | hw.pat.VH.y     | -0.00776 |
| fw.pat.OA.y    | -0.00219 | fw.pat.P.x      | 0.007445 |
| hw.pat.OA.y    | -0.0021  | hw.pat.OA.y     | -0.00628 |
| fw.pat.E.y     | -0.00138 | fw.pat.P.y      | -0.00521 |
| hw.pat.VH.mean | -0.00134 | fw.pat.VH.y     | -0.00456 |



|             |          |             |          |
|-------------|----------|-------------|----------|
| fw.pat.P.y  | 0.001317 | fw.pat.DR.y | -0.0044  |
| hw.pat.DR.y | -0.00032 | fw.pat.L.y  | 0.004068 |
| hw.pat.P.y  | -0.00031 | hw.pat.L.y  | -0.00308 |

## Pairwise comparison table

**Supplementary Table 12 | Tukey posthoc test for real pairwise comparisons between butterflies (GA generated natural) and all naturally occurring butterflies**

| Contrast                                 | Estimate | SE       | DF      | T ratio  | P value |
|------------------------------------------|----------|----------|---------|----------|---------|
| Nature vs Unevolved                      | -0.10241 | 0.000996 | 2847828 | -102.792 | <.0001  |
| Nature vs Forwards-Confusion             | 0.05566  | 0.00461  | 2847828 | 12.066   | <.0001  |
| Nature vs Sideways-Confusion             | -0.00096 | 0.00416  | 2847828 | -0.231   | 0.9999  |
| Nature vs Forwards-Energy                | -0.12157 | 0.00447  | 2847828 | -27.212  | <.0001  |
| Nature vs Random-Selection               | -0.06167 | 0.00454  | 2847828 | -13.589  | <.0001  |
| Unevolved vs Forwards-Confusion          | 0.15806  | 0.00455  | 2847828 | 34.742   | <.0001  |
| Unevolved vs Sideways-Confusion          | 0.10145  | 0.00409  | 2847828 | 24.813   | <.0001  |
| Unevolved vs Forwards-Energy             | -0.01916 | 0.0044   | 2847828 | -4.353   | 0.0002  |
| Unevolved vs Random-Selection            | 0.04074  | 0.00447  | 2847828 | 9.105    | <.0001  |
| Forwards-Confusion vs Sideways-Confusion | -0.05662 | 0.00608  | 2847828 | -9.308   | <.0001  |
| Forwards-Confusion vs Forwards-Energy    | -0.17723 | 0.0063   | 2847828 | -28.14   | <.0001  |
| Forwards-Confusion vs Random-Selection   | -0.11733 | 0.00635  | 2847828 | -18.481  | <.0001  |
| Sideways-Confusion vs Forwards-Energy    | -0.12061 | 0.00597  | 2847828 | -20.191  | <.0001  |



|                                            |          |         |         |         |        |
|--------------------------------------------|----------|---------|---------|---------|--------|
| Sideways-Confusion vs Random-<br>Selection | -0.06071 | 0.00603 | 2847828 | -10.074 | <.0001 |
| Forwards-Energy vs Random-<br>Selection    | 0.0599   | 0.00624 | 2847828 | 9.593   | <.0001 |

485

486
